## A structural mechanism for directing inverse agonism of PPAR $\gamma$

Richard Brust<sup>1</sup>, Jinsai Shang<sup>1</sup>, Jakob Fuhrmann<sup>1</sup>, Jared Bass<sup>1</sup>, Andrew Cano<sup>1,3</sup>, Zahra Heidari<sup>4,5</sup>, Ian M. Chrisman<sup>4,5</sup>, Anne-Laure Blayo<sup>2</sup>, Patrick R. Griffin<sup>1,2</sup>, Theodore M. Kamenecka<sup>2</sup>, Travis S. Hughes<sup>4,5</sup>, and Douglas J. Kojetin<sup>1,2,\*</sup>

<sup>1</sup>Department of Integrative Structural and Computational Biology, <sup>2</sup>Department of Molecular Medicine, <sup>3</sup>TSRI High School Student Summer Internship Program, The Scripps Research Institute, Scripps Florida, Jupiter, Florida 33458, USA

<sup>4</sup>Center for Biomolecular Structure and Dynamics, <sup>5</sup>Department of Biomedical and Pharmaceutical Sciences, University of Montana, Missoula, Montana 59812, USA

\*Correspondence should be addressed to D.J.K.: E-mail: [dkojetin@scripps.edu](mailto:dkojetin@scripps.edu)

### Abstract

Small chemical modifications can have significant effects on ligand efficacy and receptor activity, but the underlying structural mechanisms can be difficult to predict from static crystal structures alone. Here we show how a simple phenyl-to-pyridyl substitution between two common covalent orthosteric ligands targeting peroxisome proliferator-activated receptor gamma (PPAR $\gamma$ ) converts a transcriptionally neutral antagonist (GW9662) into an inverse agonist (T0070907). X-ray crystallography, molecular dynamics simulations, and mutagenesis coupled to activity assays reveal a water-mediated hydrogen bond network linking the T0070907 pyridyl group to Arg288 that is essential for inverse agonism. NMR spectroscopy reveals that PPAR $\gamma$  exchanges between two long-lived conformations when bound to T0070907 but not GW9662, including a conformation that prepopulates a corepressor-bound state, priming PPAR $\gamma$  for high affinity corepressor binding. Our findings demonstrate that ligand engagement of Arg288 may provide new routes for developing PPAR $\gamma$  inverse agonist.

---

### 1 Introduction

2 The nuclear receptor peroxisome proliferator-activated receptor gamma (PPAR $\gamma$ )  
3 is a molecular target for insulin sensitizing drugs, including the thiazolidinedione (TZD)  
4 or glitazone class of antidiabetic drugs <sup>1</sup>. TZDs are full agonists of PPAR $\gamma$  that induce  
5 transcriptional activation resulting in the differentiation of multipotent mesenchymal  
6 stem cells (MSCs) into adipocytes or fat cells. Unfortunately, PPAR $\gamma$  agonists used as  
7 therapeutic agents in patients with type 2 diabetes mellitus (T2DM) display adverse side  
8 effects, including differentiation of bone tissue into fat resulting in brittle bone.

9 Although originally it was thought that full activation of PPAR $\gamma$  was required for  
10 antidiabetic efficacy, recent studies have shown that antidiabetic PPAR $\gamma$  ligands can  
11 span a wide range of efficacies—including full and partial agonists, antagonists, and  
12 inverse agonists that have robust or mild activating, neutral, or repressive  
13 transcriptional properties, respectively<sup>2-5</sup>. Importantly, repressive PPAR $\gamma$  modulators  
14 decrease fat accumulation in bone and promote bone formation<sup>5,6</sup>, and pharmacological  
15 repression or antagonism of PPAR $\gamma$  is implicated in the treatment of obesity<sup>7,8</sup> and  
16 cancer<sup>9-11</sup>.

17 In order to determine how to promote all of the positive effects of  
18 pharmacologically targeting PPAR $\gamma$  on antidiabetic efficacy, bone formation, anti-  
19 obesity, and cancer treatment, we need to understand the structural mechanisms that  
20 elicit PPAR $\gamma$  activation (agonism) and repression (inverse agonism). These distinct  
21 pharmacological phenotypes of PPAR $\gamma$  ligands are dictated by ligand-dependent  
22 recruitment of transcriptional coregulator proteins (coactivators and corepressors) to the  
23 PPAR $\gamma$  ligand-binding domain (LBD). The LBD contains the orthosteric ligand-binding  
24 pocket for endogenous ligands, which is also the binding site for most synthetic ligands,  
25 and the activation function-2 (AF-2) coregulator binding surface. The AF-2 surface is  
26 composed of three LBD structural elements: helix 3, helix 5, and the critical helix 12 that  
27 dynamically moves between two or more conformations in the absence of ligand<sup>12</sup>.

28 The structural mechanisms affording activation of PPAR $\gamma$  are well understood.  
29 Agonists stabilize an active state of the AF-2 surface by forming hydrogen bonds with  
30 residues near helix 12. Full agonists form a critical hydrogen bond with the phenolic side  
31 chain of Y473 on helix 12, strengthen coactivator and weaken corepressor binding  
32 affinities, respectively, which induces robust transcriptional activation<sup>12-14</sup>. Partial or  
33 graded agonists do not hydrogen bond to Y473, but mildly stabilize helix 12 via  
34 interactions with other regions of the ligand-binding pocket, resulting less pronounced  
35 changes in coregulator affinity and transcriptional activation<sup>13-15</sup>. Neutral or passive  
36 antagonists, which make unfavorable interactions with F282 on helix 3, do not stabilize  
37 helix 12 and display negligible changes in activation<sup>3</sup>. These findings have established  
38 the structural mechanisms for eliciting robust (agonist), weak (partial agonist), or no  
39 (antagonist) transcriptional activation of PPAR $\gamma$ . An inverse agonist has a profile  
40 opposite of an agonist, increasing the binding affinity of corepressors and decreasing the  
41 binding affinity of coactivators resulting in transcriptional repression. However,  
42 relatively few studies have explored the structural mechanisms by which ligands repress  
43 PPAR $\gamma$  transcription<sup>6,16</sup>, and it remains poorly understood how to design inverse  
44 agonists.

45 Here we compare two commonly used covalent PPAR $\gamma$  ligands, GW9662<sup>17</sup> and  
46 T0070907<sup>18</sup>, which are referred to as antagonists not because of their effects on PPAR $\gamma$   
47 transcription, but because they covalently attach to C285 and physically block ligand  
48 binding to the orthosteric ligand-binding pocket. Remarkably, despite differing only by  
49 a simple methine (CH) to nitrogen substitution, T0070907 displays properties of an

50 inverse agonist compared to GW9662, which shows negligible effects on transcription<sup>17-</sup>  
51<sup>19</sup>. To understand the structural basis for these effects, we solved the crystal structure of  
52 T0070907-bound PPAR $\gamma$ , which revealed no major overall structural differences  
53 compared to a crystal structure of GW9662-bound PPAR $\gamma$  that would explain the  
54 difference in efficacy. However, detailed structural analysis revealed a water-mediated  
55 hydrogen bond network that uniquely links R288 to the T0070907 pyridyl group—an  
56 interaction that cannot occur with GW9662, which lacks a hydrogen bond acceptor.  
57 NMR analysis revealed that T0070907-bound PPAR $\gamma$  populates two long-lived  
58 structural conformations, one of which resembles the state populated by GW9662 and a  
59 unique state that is similar to the corepressor-bound state, revealing a novel structural  
60 mechanism for directing inverse agonism of PPAR $\gamma$ .

## 61 Results

### 62 *T0070907 is an inverse agonist*

63 GW9662 and T0070907 (**Figure 1A**) contain the same 2-chloro-5-nitro-*N*-  
64 phenylbenzamide scaffold but differ by a simple atom change: a ring carbon in GW9662  
65 phenyl group is replaced by a nitrogen-containing pyridyl group in T0070907. Using a  
66 cell-based transcription assay (**Figure 1B**), we compared GW9662 and T0070907 to other  
67 noncovalent activating and repressive PPAR $\gamma$  compounds (**Figure S1**). T0070907  
68 repressed PPAR $\gamma$  transcription relative to DMSO treated cells, opposite to the agonist  
69 rosiglitazone that increased PPAR $\gamma$  transcription, whereas GW9662 did not significantly  
70 affect PPAR $\gamma$  transcription. The repressive efficacy of T0070907 is similar to or better  
71 than SR10221 and SR2595, respectively, which are analogs of the neutral  
72 antagonist/nonagonist parent compound SR1664<sup>6</sup>.

73 We next characterized how the ligands affect the recruitment of peptides derived  
74 from the TRAP220 coactivator and the NCoR corepressor (**Figure 1C**), two coregulator  
75 proteins that influence PPAR $\gamma$ -mediated transcription<sup>20,21</sup>. Compared to unliganded  
76 PPAR $\gamma$  (**Figure 1D**), nonanoic acid (a natural PPAR $\gamma$  agonist)<sup>22</sup> and to a larger degree  
77 rosiglitazone (a synthetic PPAR $\gamma$  agonist) increased the affinity of TRAP220 and  
78 decreased the affinity of NCoR. Characteristic of an inverse agonist, T0070907 displayed  
79 an opposite profile to the agonists: decreasing the affinity of TRAP220 and increasing the  
80 affinity of NCoR. GW9662 displayed a similar trend as T0070907, though the changes in  
81 coregulator affinity were subtler: the affinity for NCoR increased, but unlike T0070907  
82 the affinity for TRAP220 did not change (weaken) appreciably. Interestingly, the  
83 repressive compounds SR2595 and SR10221 have distinct profiles compared to  
84 T0070907: characteristic of a direct antagonist, they decreased affinity for both TRAP220  
85 and NCoR.

86 We were interested in the structural mechanism by which the seemingly minor  
87 methine-to-nitrogen ligand substitution could switch a covalent neutral antagonist  
88 (GW9662) into a covalent inverse agonist (T0070907). Noncovalent analogs of the PPAR $\gamma$

89 agonist farglitazar<sup>16</sup> and the neutral antagonist/nonagonist SR1664<sup>6</sup> were designed to  
90 perturb the conformation of the helix 12/AF-2 surface. The farglitazar analogs contain  
91 ligand extensions towards helix 12. SR2595 and SR10221 contain a tert-butyl extension  
92 that perturbed the conformation of F282 on helix 3 (**Figure 1E**) located within the  
93 orthosteric pocket near the loop preceding helix 12, a region we refer to as the helix 12  
94 subpocket. We previously showed that the F282/AF-2 steric clash caused by SR2595 and  
95 SR10221 binding increases the dynamics of helix 3, which is part of the AF-2 surface,  
96 thereby reducing the basal activity of PPAR $\gamma$ <sup>6</sup>. Our coregulator recruitment data show  
97 this AF-2 clash affords a direct antagonist profile for SR2595 and SR10221 that leads to  
98 transcriptional repression (**Figure 1B–D**). However, the phenyl (GW9662) to pyridyl  
99 (T0070907) change is distant from F282, the helix 12 subpocket, or the AF-2 surface  
100 (**Figure 1E**), suggesting the inverse agonist profile of T0070907 may originate from a  
101 unique structural mechanism.

#### 102 *A pyridyl-water hydrogen bond network unique to T0070907*

103 To gain structural insight into the mechanism of action, we solved the crystal  
104 structure of T0070907 covalently bound to PPAR $\gamma$  to a resolution of 2.26 Å (PDB code  
105 6C1I; **Table S1**) and compared our structure to an available crystal structure of GW9662-  
106 bound PPAR $\gamma$  (PDB code 3B0R). In both cases, PPAR $\gamma$  crystallized in the same space  
107 group and contained a dimer in the asymmetric unit with the expected alpha helical  
108 sandwich fold (**Figure 2A**). Structural superposition revealed nearly identical backbone  
109 conformations between the two structures (C $\alpha$  r.m.s.d.: overall, 1.7 Å; chain A only,  
110 1.34 Å; chain B only, 1.73 Å). In each of the structures, chain A adopts an “active”  
111 conformation with helix 12 docked into the activation function-2 (AF-2) surface, whereas  
112 helix 12 in chain B is distorted due to crystal packing interactions (**Figure S2**). Our  
113 crystals of T0070907-bound PPAR $\gamma$  were obtained by soaking the ligand into preformed  
114 apo-protein crystals since our cocrystallization attempts failed. Strong electron density  
115 was observed for T0070907 in chain B and lower, less defined electron density in chain  
116 A.

117 Focusing on the pyridyl ring of T0070907, a water-mediated hydrogen bond  
118 network connects the pyridyl nitrogen to the N $\epsilon$  atom in the R288 side-chain  
119 (**Figure 2B**). Furthermore, the guanidinyll side chain of R288 forms a bipartite hydrogen  
120 bond with the side chain of E295. In contrast, in the GW9662-bound structure the  
121 hydrogen bond network is not extensive due the lack of a hydrogen bond acceptor in the  
122 phenyl ring of GW9662 (**Figure 2C**). To confirm the stability of the network observed in  
123 the crystal structures, we performed molecular dynamics simulations of T0070907- and  
124 GW9662-bound PPAR $\gamma$  ranging from 4–26 microseconds in length (**Figure 2D**)  
125 preserving the crystallized waters (xtal), as well as a model we generated of T0070907-  
126 bound PPAR $\gamma$  from the GW9662-bound PPAR $\gamma$  crystal structure solvated without  
127 crystallized waters (model). In the simulations, the pyridyl group of T0070907 was  
128 hydrogen bonded to a water molecule for a significant fraction of the simulation (65–  
129 95%), as was the water-bridged R288-T0070907 pyridyl (5–46%). In contrast, a direct

130 interaction between R288 and the pyridyl group of T0070907 not mediated by water was  
131 lowly populated (<2%). A direct (4–64%) and water-bridged (3–61%) R288-E295  
132 interaction was also confirmed. The extensive pyridyl-based water-mediated hydrogen  
133 bond network is not possible to the hydrophobic phenyl group of GW9662, revealing a  
134 unique chemical feature in T0070907 that could confer inverse agonism.

135 *The pyridyl-water network is essential for inverse agonism*

136 To test the functional role of the pyridyl-water hydrogen bond network observed  
137 in our T0070907-bound crystal structure, we generated variants of PPAR $\gamma$  by mutating  
138 residues that we predicted would maintain or break the pyridyl-water network. We  
139 hypothesized that mutation of R288 to a different positively charged residue (R288K)  
140 would maintain the pyridyl-water network, whereas mutation to a hydrophobic residue  
141 (R288A or R288L) would break the pyridyl-water network. If the hydrogen bond  
142 network is important for inverse agonism, we hypothesized that breaking this network  
143 via hydrophobic R288 mutations would afford a similar functional efficacy profile for  
144 both T0070907 and GW9662. We also generated a E295A mutation to test the importance  
145 of the bipartite hydrogen bond between R288 and E295. These mutations did not affect  
146 the structural integrity or stability of the PPAR $\gamma$  LBD as assessed by circular dichroism  
147 (CD) spectroscopy (**Figure S3**).

148 Using a cell-based transcription assay, we tested the combined effect of the  
149 mutants and covalent ligands on PPAR $\gamma$  cellular activation (**Figure 3A**). Wild-type  
150 PPAR $\gamma$  and the R288K mutant showed a similar profile, where cells treated with  
151 T0070907 showed decreased PPAR $\gamma$  transcription compared to DMSO or GW9662  
152 treatment. In contrast, T0070907 did not decrease transcription for the R288A or R288L  
153 mutants, indicating the R288-mediated pyridyl-water network is responsible for the  
154 transcriptional repression conferred by T0070907. The E295A mutant maintained the  
155 cellular efficacy preference of T0070907 over GW9662, indicating that bipartite hydrogen  
156 bond is not a major contributor to stabilizing the repressive activity, though both  
157 GW9662 and T0070907 showed lower activity compared to wild-type PPAR $\gamma$ .

158 We next tested the effect of the mutants on coregulator recruitment by  
159 determining binding affinities for the TRAP220 (**Figure 3B**) and NCoR (**Figure 3C**)  
160 peptides for wild-type PPAR $\gamma$  LBD and the mutant variants with or without  
161 pretreatment with GW9662 or T0070907. Consistent with the cell-based transcription  
162 assay, the R288K and E295A mutants maintained the inverse agonist coregulator  
163 binding profile of T0070907 and rank ordering. In contrast, the R288A and R288L  
164 mutants showed similar affinity for TRAP220 and NCoR when covalently bound to  
165 T0070907 or GW9662. This indicates the pyridyl-water network directs the inverse  
166 agonism profile of T0070907, the lack of which results in a neutral antagonist profile.

167 To more robustly compare how the wild-type and mutant PPAR $\gamma$  variants  
168 performed in the above assays, we performed a version of the “web of efficacy” analysis



169 used in the G-protein coupled receptor (GPCR) field to study ligand signaling bias<sup>23,24</sup>.  
170 We plotted the multivariate data on a radar chart with axes corresponding to each of the  
171 assays whereby conditions with the most efficacious (i.e., that are biased towards)  
172 inverse agonism properties populate the outer ring of the radar chart, and less favorable  
173 or efficacious conditions populate the center (**Figure 3F**). The analysis clearly shows that  
174 T0070907 selects more efficacious inverse agonism functions only for wild-type PPAR $\gamma$   
175 and the R288K mutant variant (**Figure 3G**). This dramatic result reveals that R288-  
176 mediated pyridyl-water network directs inverse agonism conferred by T0070907.

#### 177 *T0070907-bound PPAR $\gamma$ exchanges between two long-lived conformations*

178 Despite the different inverse agonist and neutral antagonist profiles of T0070907  
179 and GW9662, the pyridyl-water network is the primary structural difference observed in  
180 the crystal structures. In principle, there should be structural changes in the AF-2  
181 coregulator interaction surface to account for the different pharmacological profiles.  
182 Notably, however, the conformation of the AF-2 surface, which includes helix 12, is  
183 influenced by crystal contacts (**Figure S2**). Furthermore, structural superposition of  
184 PPAR $\gamma$  crystal structures bound to pharmacologically distinct ligands shows no major  
185 structural changes that explain their different activities<sup>25</sup>. However, NMR studies have  
186 shown that the orthosteric pocket and helix 12 are dynamic on the microsecond-to-  
187 millisecond ( $\mu$ s-ms) time scale in the ligand-free/apo-form, which results in very broad  
188 or unobserved NMR peaks for residues in helix 12 and within the orthosteric pocket and  
189 surrounding regions<sup>6,13</sup>. Binding of a noncovalent full agonist stabilizes the helix 12/AF-  
190 2 surface resulting in the appearance of NMR peaks that were missing in the apo-form,  
191 whereas noncovalent partial agonists, neutral antagonists, and inverse agonists do not  
192 stabilize helix 12<sup>6,13,25</sup>.

193 We used NMR spectroscopy to assess the impact of T0070907 and GW9662 on  
194 the dynamics of the PPAR $\gamma$  LBD. NMR data of apo-PPAR $\gamma$  are similar to PPAR $\gamma$   
195 covalently bound to GW9662 with widespread  $\mu$ s-ms dynamics in the ligand-binding  
196 pocket and helix 12/AF-2 surface<sup>26</sup>. In remarkable contrast, T0070907-bound PPAR $\gamma$   
197 showed a wide-spread stabilization of  $\mu$ s-ms dynamics, evident by the appearance of  
198 peaks in 2D [<sup>1</sup>H,<sup>15</sup>N]-transverse relaxation optimized spectroscopy-heteronuclear single  
199 quantum coherence (TROSY-HSQC) NMR spectra relative to GW9662-bound PPAR $\gamma$   
200 (**Figure 4A**). This includes well-resolved T0070907-bound NMR peaks corresponding to  
201 residues located in close proximity to the T0070907 R288-mediated pyridyl-water  
202 network (**Figure 4B**) in the  $\beta$ -sheet (V248, G344, G346), helix 3 (I279, G284) and the  
203 adjacent helix 7 (G361). Furthermore, an NMR peak V322 on helix 5 within the AF-2  
204 surface also appears, indicating stabilization of the AF-2 surface. The T0070907-bound  
205 crystal structure shows a larger network of water-mediated hydrogen bonds, which  
206 form a molecular hub linking the pyridyl-water network to the the  $\beta$ -sheet (via backbone  
207 hydrogen bonds to I341 and E343) and helix 5 (via backbone hydrogen bond to I326).

208 Temperature-dependent NMR studies (**Figure 4C**) further revealed a number of  
209 PPAR $\gamma$  residues experience peak doubling when bound to T0070907, but not when  
210 bound to GW9662, including G399 located near the AF-2 surface (**Figure 4B**). Peak  
211 doubling indicates the presence of two long-lived T0070907-bound structural  
212 conformations in slow exchange on the NMR time scale, where the difference in  
213 chemical shift between the two states ( $\Delta\nu$ , in Hz) is much greater than the exchange rate  
214 ( $k_{ex}$ ) between conformations on the order of milliseconds-to-seconds (ms-s)<sup>27</sup>. Thus, the  
215 increase in NMR peaks when PPAR $\gamma$  is bound to T0070907 is not only due to  
216 stabilization of  $\mu$ s-ms dynamics but also the presence of two long-lived structural  
217 conformations.

218 ZZ-exchange NMR experiments (also called EXSY, or exchange spectroscopy)  
219 enable detection of the interconversion between long-lived structural states via transfer  
220 of the <sup>1</sup>H chemical shift of one state to the other when  $k_{ex} \approx 0.2-100 \text{ s}^{-1}$  and  $k_{ex} \gg \Delta\nu$ .  
221 Exchange crosspeaks for G399, which shows well dispersed peak doubling, were  
222 observed at 37°C but not at 25°C (**Figure 4D**), indicating the exchange between the two  
223 conformations is too slow to be measured at room temperature ( $k_{ex} < 0.2/\text{s}$ ). To determine  
224 an exchange rate, we performed ZZ-exchange experiments with varying exchange  
225 delays at 37°C and fit the data to a two-state interconversion model (**Figure 4E**), which  
226 provided an exchange rate of  $\sim 2.1/\text{s}$  between the upfield shifted state ( $P_A = 37\%$ ;  $k_{A \rightarrow B} =$   
227  $0.8/\text{s}$ ) and downfield shifted state ( $P_B = 63\%$ ;  $k_{B \rightarrow A} = 1.3/\text{s}$ ). Notable peak doubling, many  
228 of which show well dispersed exchange crosspeaks, is widespread through the PPAR $\gamma$   
229 LBD (**Figure S4A**), though in most cases spectral overlap did not permit fitting of the  
230 data to extract an exchange rate. However, residues with notable peak doubling  
231 comprise distant structural regions that are also connected via the aforementioned  
232 extended pyridyl-water network (**Figure 4B**), including the  $\beta$ -sheet (G338) and helix 6  
233 (R350, S355, L356) within the ligand-binding pocket; a surface comprising helix 2a  
234 (R234) and the C-terminal region of helix 7 and the loop connecting helix 7 and 8 (K373,  
235 N375, E378, D380); helix 3 near the AF-2 surface (I303); and the loop connecting helix 8  
236 and 9 near the AF-2 surface (S394), which also includes G399. In total, the NMR analysis  
237 revealed that T0070907-bound PPAR $\gamma$  undergoes a global conformational change  
238 between two long-lived structural conformations.

239 *T0070907 populates a mutual conformation with GW9662 and a unique conformation*

240 G399 is an ideal NMR observable probe that is sensitive to the conformation of  
241 the AF-2 surface: it is structurally proximal and linked to the AF-2 surface through  
242 water-mediated hydrogen bonds to N312 and D311 on helix 5, but does not directly  
243 interact with a bound coregulator peptide (**Figure 5A**). Strikingly, for G399 and the other  
244 residues that showed peak doubling in the ZZ exchange analysis, we found that the  
245 backbone amide chemical shifts of one of the two peaks observed for T0070907-bound  
246 PPAR $\gamma$  are similar to the single peak observed for GW9662-bound PPAR $\gamma$  (**Figure 5B**  
247 **and Figure S4B**). This indicates that one of the long-lived T0070907-bound  
248 conformations is structurally similar to GW9662-bound PPAR $\gamma$ , which below we refer to

249 as the mutual conformation, and the other conformation is uniquely populated only  
250 when bound to T0070907.

251 We also assessed the conformational state of helix 12 directly using  $^{19}\text{F}$  NMR  
252 (**Figure 5C**) by attaching the  $^{19}\text{F}$  NMR-detectible probe 3-bromo-1,1,1-trifluoroacetone  
253 (BTFA) on K474 (**Figure 5A**). The  $^{19}\text{F}$  spectral profile of GW9662-bound PPAR $\gamma$  revealed  
254 two peaks corresponding to a major state (right peak; 78%) and minor state (left peak;  
255 22%). T0070907-bound PPAR $\gamma$  also shows two peaks with chemical shift values similar  
256 to GW9662-bound PPAR $\gamma$ , but the population magnitudes of the states are switched and  
257 skewed towards the left peak. Strikingly, this helix 12/AF-2 surface  $^{19}\text{F}$  NMR probe  
258 showed the same relative population sizes observed in the G399/proxy to the AF-2  
259 surface ZZ-exchange analysis (34% and 66%, respectively). The right peak abundantly  
260 populated by GW9662 and moderately populated by T0070907 likely corresponds to the  
261 mutual G399 conformation from the 2D NMR analysis. In contrast, the left  $^{19}\text{F}$  NMR  
262 peak likely corresponds to the unique G399 conformation; this peak is abundantly  
263 populated by T0070907 but lowly populated by GW9662. The low abundance of this  
264 peak when bound to GW9662 could explain in part why it was not detected by the 2D  
265 NMR analysis, which has lower overall sensitivity of signal-to-noise compared to the  $^{19}\text{F}$   
266 NMR analysis. However, the BTFA probe attached to helix 12 may also be sensitive to  
267 larger structural changes, and thus chemical environments, compared to backbone  
268 amide of G399.

269 *The unique T0070907 conformation prepopulates a corepressor-bound conformation*

270 We wondered whether the unique and mutual long-lived T0070907-bound  
271 conformations would display similar or distinct coregulator interaction preferences. To  
272 test this, we titrated the NCoR corepressor and TRAP220 coactivator peptides and  
273 monitored their binding to  $^{15}\text{N}$ -PPAR $\gamma$  LBD by NMR. Remarkably, titration of NCoR  
274 corepressor peptide into T0070907-bound PPAR $\gamma$  (**Figure 5D,E**) resulted first in a  
275 shifting of the unique G399 conformation (peak *B*) towards a similar chemical shifts  
276 values and intensity, nearly saturating around 0.6 equiv NCoR, which is the  
277 approximate population ( $P_B$ ) of the state from the ZZ-exchange analysis. Only minor  
278 changes in peak intensity were observed for the mutual peak (peak *A*) until the titration  
279 reached 0.6 equiv NCoR peptide, at which point this peak decreased in intensity with a  
280 concomitant increase in the intensity of the unique conformation peak that shifted to the  
281 NCoR-bound conformation. This second transition (peptide free state *A*  $\rightarrow$  NCoR bound  
282 state) saturated at 1 equiv of NCoR peptide in slow exchange on the NMR time scale.  
283 These results are consistent with our coregulator affinity data showing mid-nM affinity  
284 for NCoR binding.

285 We next examined the effect of TRAP220 peptide binding to T0070907-bound  
286 PPAR $\gamma$  (**Figure 5F,G**). In contrast to the NCoR results, the mutual conformation of G399  
287 (state *A*) transitioned first to a peak with similar chemical shift values and intensity. This  
288 first transition saturated at the first titration point (0.5 equiv), which is slightly larger



289 than the approximate population ( $P_A$ ) of the state from the ZZ-exchange analysis. A  
290 second transition also occurred where the unique conformation (state *B*) showed a  
291 decrease in peak intensity, but only at TRAP220 amounts more than 0.5 equiv, which  
292 resulted in a concomitant increase in the intensity of the mutual peak that shifted to the  
293 TRAP220-bound peak. This second transition did not saturate until 4 equiv of TRAP220  
294 was added, indicating that the unique conformation displays much weaker affinity for  
295 TRAP220 relative to the mutual conformation. Notably, the same coregulator binding  
296 trends for the other residues with peak doubling, where NCoR binding shifts the peak  
297 populations towards the unique state *B* (**Figure S4C**) and TRAP220 binding shifts the  
298 peak populations towards the mutual state *A* (**Figure S4D**).

299 Finally, we examined the binding of GW9662-bound PPAR $\gamma$  with NCoR (**Figure**  
300 **5H**) and TRAP220 (**Figure 5I**). Interestingly, whereas NCoR or TRAP220 binding to  
301 T0070907-bound PPAR $\gamma$  consolidated the unique and mutual conformations into one  
302 peptide-bound conformation, NCoR binding to GW9662-bound PPAR $\gamma$  caused peak  
303 doubling of the single GW9662-bound G399 NMR peak towards chemical shift values  
304 similar to the NCoR- and TRAP220-bound form of T0070907-bound PPAR $\gamma$ . In contrast,  
305 TRAP220 binding only shifted the single GW9662-bound G399 peak towards the  
306 TRAP220-bound form of T0070907-bound PPAR $\gamma$ .

307 These dramatic results reveal that the two long-lived T0070907-bound  
308 conformations have different binding preferences for NCoR and TRAP220. The NMR  
309 chemical shift perturbation profiles reveal that the unique conformation has strong  
310 affinity for NCoR but weak affinity for TRAP220, whereas the mutual conformation has  
311 moderate affinity for NCoR and strong affinity for TRAP220. Moreover, the NMR  
312 chemical shifts of the unique and mutual T0070907-bound conformations in the absence  
313 of coregulator peptide are similar to the NCoR- and TRAP220-bound forms,  
314 respectively. This indicates that the unique and mutual T0070907-bound states  
315 prepopulate a corepressor-like and coactivator-like bound conformation that  
316 individually afford privileged high-affinity binding to NCoR and TRAP220,  
317 respectively. Furthermore, the chemical shift difference between the unique T0070907  
318 conformation and NCoR-bound state (i.e., the degree of state *B* shifting) is much smaller  
319 than the mutual conformation and TRAP220-bound state (i.e., the degree of state *A*  
320 shifting). This indicates the corepressor-like conformation prepopulated by T0070907 is  
321 more similar to the corepressor-bound state than the coactivator-like conformation  
322 prepopulated by T0070907 is to the coactivator-bound state. In contrast, NCoR binding  
323 to GW9662-bound PPAR $\gamma$  introduces a “conformational frustration” within the AF-2  
324 surface. In addition to not prepopulating the corepressor-bound conformation, the AF-2  
325 surface of GW9662-bound PPAR $\gamma$  is found in both the corepressor- and coactivator-  
326 bound conformations upon binding NCoR—both of which could contribute to the  
327 neutral antagonism profile for GW9662 as opposed to the enhanced inverse agonism  
328 profile of T0070907 derived through prepopulation of conformational states that have  
329 high affinity for corepressor and low affinity for coactivator.

## 330 Discussion

331 Carbon (methine)-to-nitrogen ligand substitutions are known to have beneficial  
332 effects on pharmacological parameters<sup>28</sup>, though it is difficult to predict how subtle  
333 changes in chemical structure impact switches in functional efficacy<sup>29,30</sup>. GW9662 and  
334 T0070907 are widely used as chemical tools due to their ability to covalently bind to  
335 PPAR $\gamma$  and inhibit ligand binding to the orthosteric ligand-binding pocket. Although it  
336 is generally acknowledged that these highly similar compounds display distinct PPAR $\gamma$   
337 activity profiles, the molecular basis for their functional differences in efficacy has  
338 remained elusive. Our studies, which combine crystallography, molecular dynamics  
339 simulations, NMR spectroscopy, and mutagenesis coupled with biochemical and  
340 cellular assays, illuminate a novel structural mechanism affording the inverse agonism  
341 of T0070907. Our crystal structure of T0070907-bound PPAR $\gamma$  revealed a water-mediated  
342 hydrogen bond network linking the critical inverse agonist “switch” residue, R288,  
343 which is distal from the activation function-2 (AF-2) coregulator interaction surface, to  
344 the pyridyl group of T0070907. Our NMR analysis shows that T0070907-bound PPAR $\gamma$ ,  
345 but not GW9662-bound PPAR $\gamma$ , slowly exchanges between two long-lived  
346 conformations. One of these conformations is shared with GW9662-bound PPAR $\gamma$  and  
347 similar to the coactivator-bound state. The other conformation is uniquely and  
348 abundantly populated by T0070907 and highly similar to the corepressor-bound state,  
349 thus affording higher affinity corepressor binding and inverse agonism for T0070907.

350 We demonstrated the importance of the pyridyl-water network in directing  
351 inverse agonism of PPAR $\gamma$  using mutagenesis coupled with functional assays. However,  
352 no major structural differences were observed in the crystal structures that explain their  
353 functional profiles. In contrast, our NMR data revealed clearly that T0070907-bound  
354 PPAR $\gamma$ , but not GW9662-bound PPAR $\gamma$ , exchanges between two long-lived  
355 conformations, one of which prepopulates a conformation similar to the corepressor-bound  
356 state. The active AF-2 conformation bound to a coactivator peptide has captured in  
357 numerous crystal structures of PPAR $\gamma$  and other nuclear receptors. Thus far, no  
358 structures have been reported for PPAR $\gamma$  bound to a corepressor peptide and, relative to  
359 coactivator-bound structures, a limited number of structures have been reported for  
360 corepressor-bound nuclear receptors<sup>31</sup>. However, from these studies it is known that the  
361 binding regions of coactivator and corepressor (NCoR and SMRT) peptides overlap. In  
362 the corepressor-bound structures, helix 12 is displaced from its “active” conformation  
363 and shows variability in its crystallized conformation, which may reflect a dynamic  
364 “inactive” conformational profile. Our NMR studies show that as a whole the AF-2  
365 surface, using G399 as a proxy, is primed for high affinity binding to NCoR when  
366 PPAR $\gamma$  is bound to T0070907.

367 There are two main underlying conclusions from our NMR findings on  
368 T0070907-bound PPAR $\gamma$ . First, the crystallized AF-2 conformations do not likely  
369 represent the conformations of T0070907-bound PPAR $\gamma$  in solution, since crystal  
370 packing influence the position of helix 12. Our differential NMR analysis not only

371 revealed peak doubling for T0070907-bound PPAR $\gamma$  but also a stabilization of  $\mu$ s-ms  
372 timescale dynamics relative to GW9662-bound PPAR $\gamma$ . Furthermore, using  $^{19}\text{F}$  NMR we  
373 showed that helix 12 dynamically exchanges between two long-lived conformations, one  
374 of which is significantly populated only by T0070907. Second, we used molecular  
375 dynamics simulations to verify the structural integrity of the pyridyl-water network.  
376 However, given that the NMR-detected exchange rate between the two T0070907-bound  
377 conformations is  $>1\text{s}$ , access to helix 12/AF-2 conformations that would be consistent  
378 with our NMR data in molecular simulations is inaccessible with current standard  
379 simulation approaches. Overall, our work shows that the combination of different but  
380 complementary structural methods—crystallography, NMR, and molecular  
381 simulations—provides the full picture of ligand mechanism of action, which as we  
382 demonstrate here, involves a simultaneous prepopulation of long-lived conformational  
383 states with distinct functions.

384 Our findings suggest a new means for pharmacologically directing  
385 transcriptional repression via inverse agonism of PPAR $\gamma$ . The previous finding that  
386 ligand engagement of, or hydrogen binding to, helix 12 via Y473 is critical for mediating  
387 agonism transformed the way that PPAR $\gamma$  agonists were developed <sup>32</sup>. The AF-2 steric  
388 clash mechanism of action for the repressive PPAR $\gamma$  compounds SR2595 and SR10221 <sup>6,16</sup>  
389 shows a coregulator interaction profile consistent with a direct antagonist rather than an  
390 inverse agonist. In contrast, our studies here indicate that ligand hydrogen bonding to  
391 the guanidinyll side chain of R288, water-mediated or perhaps directly, may be a critical  
392 mediator of inverse agonism. Repressive PPAR $\gamma$  modulators show promise for  
393 improving the therapeutic index associated with anti-diabetic PPAR $\gamma$  ligands by  
394 promoting bone formation rather than decreasing bone mass <sup>5,6</sup>, which occurs with  
395 agonists used clinically such as the TZDs. Furthermore, repression of PPAR $\gamma$  activity  
396 affects fat mobilization and may be a means to therapeutically treat obesity and extend  
397 lifespan <sup>7</sup>, and T0070907 has demonstrated efficacy in cancer models <sup>9-11</sup>. Thus, our  
398 findings should inspire future work to develop and characterize inverse agonists to  
399 probe the repressive functions of PPAR $\gamma$ .

## 400 **Methods**

### 401 *Materials and reagents*

402 Human PPAR $\gamma$  LBD (residues 203–477 in isoform 1 numbering, which is  
403 commonly used in published structural studies and thus throughout this manuscript; or  
404 residues 231–505 in isoform 2 numbering) or mutant proteins were expressed in  
405 *Escherichia coli* BL21(DE3) cells as TEV-cleavable hexahistidine-tagged fusion protein  
406 using a pET46 plasmid as previously described <sup>13,26</sup>. The final storage buffer for samples  
407 following size exclusion chromatography and subsequently frozen at  $-80\text{ }^{\circ}\text{C}$  was 50 mM  
408 potassium chloride (pH 7.4), 20 mM potassium phosphate, 5 mM TCEP, and 0.5 mM  
409 EDTA. Covalent ligand treatment was performed overnight at  $4\text{ }^{\circ}\text{C}$  with a 2X molar  
410 excess of compound dissolved in  $d_6$ -DMSO. Mammalian expression plasmids included

411 Gal4-PPAR $\gamma$ -hinge-LBD (residues 185-477 in isoform 1 numbering; 213-505 in isoform 2  
412 numbering) inserted in pBIND plasmid; and full-length PPAR $\gamma$  (residues 1-505; isoform  
413 2) inserted in pCMV6-XL4 plasmid. Mutant proteins were generated using site directed  
414 mutagenesis of the aforementioned plasmids. GW9662, T0070907, and SR1664 were  
415 obtained from Cayman Chemical; rosiglitazone was obtained from Tocris Bioscience and  
416 Cayman Chemical; SR2595 and SR10221 were previously synthesized in house <sup>6</sup>.  
417 Peptides of LXXLL-containing motifs from TRAP220 (residues 638–656;  
418 NTKNHPLMLNLLKDNPAQD) and NCoR (2256–2278;  
419 DPASNLGLEDIIRKALMGSFDDK) containing a N-terminal FITC label with a six-  
420 carbon linker (Ahx) and an amidated C-terminus for stability were synthesized by  
421 LifeTein.

#### 422 *Cell-based transcriptional luciferase reporter assay*

423 HEK293T cells were cultured in DMEM medium supplemented with 10% fetal  
424 bovine serum (FBS) and 50 units ml<sup>-1</sup> of penicillin, streptomycin, and glutamine. Cells  
425 were grown to 90 % confluency and then seeded in 10 cm dishes at 4 million cells per  
426 well. Cells were transfected using X-tremegene 9 (Roche) and Opti-MEM (Gibco) with  
427 pCMV6 full-length PPAR $\gamma$  expression plasmid (4.5  $\mu$ g) and 3xPPRE-luciferase reporter  
428 pGL2 plasmid (4.5  $\mu$ g) and incubated for 18 h; plasmids were obtained from P. Griffin  
429 (Scripps) as used in previous studies. <sup>3,6,13,26</sup> Cells were transferred to white 384-well  
430 plates (Thermo Fisher Scientific) at 10,000 cells/well in 20  $\mu$ L and incubated for 4 hr.  
431 Ligand (5  $\mu$ M) or vehicle control was added (20  $\mu$ L), cells incubated for 18 hr and  
432 harvested for luciferase activity quantified using Britelite Plus (Perkin Elmer; 20  $\mu$ L) on a  
433 BioTek Synergy Neo multimode plate reader (Biotek). Data were analyzed using  
434 GraphPad Prism (luciferase activity vs. ligand concentration) and fit to a sigmoidal dose  
435 response curve.

#### 436 *Fluorescence polarization (FP) coregulator interaction assay*

437 The assay was performed in black 384-well plates (Greiner) in assay buffer (see  
438 above). His-PPAR $\gamma$  LBD was pre-incubated with or without a 2X molar excess of  
439 covalent ligand overnight at 4 °C and diluted by serial dilution. Noncovalent  
440 compounds were incubated with a constant concentration of 90  $\mu$ M, equivalent to the  
441 maximum protein concentration, to ensure full occupancy. FITC-labeled NCoR and  
442 TRAP220 peptides were plated at a final concentration of 100 nM. Plates were incubated  
443 for 2 hr at 4 °C and measured on a BioTek Synergy Neo multimode plate reader at  
444 485 nm emission and 528 nm excitation wavelengths. Data were plotted using GraphPad  
445 Prism and fit to one-site binding equation.

#### 446 *Crystallography*

447 PPAR $\gamma$  LBD protein was concentrated to 10 mg/ml and buffer exchange into  
448 phosphate buffer (20 mM KH<sub>2</sub>PO<sub>4</sub>/K<sub>2</sub>HPO<sub>4</sub>, pH 8, 50 mM KCl, 5 mM TCEP). Apo-

449 PPAR $\gamma$  crystals were obtained after 3–5 days at 22°C by sitting-drop vapor diffusion  
450 against 50  $\mu$ l of well solution using 96-well format crystallization plates. The  
451 crystallization drops contain 1  $\mu$ l of protein sample mixed with 1  $\mu$ l of reservoir solution  
452 containing 0.1 M MOPS, 0.8 M sodium citrate at pH 6.5. T0070907 was soaked into the  
453 PPAR $\gamma$  apo-crystals drop by adding 1  $\mu$ l of compound at a concentration of 1 mM  
454 suspended in the same reservoir solution for 3 weeks. Crystals were cryoprotected by  
455 immersion in mother liquor containing 12% glycerol and flash-cooled in liquid nitrogen  
456 before data collection. Data collection was carried out at Beamlines 5.0.1 of BCSB at the  
457 Advanced Light Source (Lawrence Berkeley National Laboratory). Data were processed,  
458 integrated, and scaled with the programs Mosflm and Scala in CCP4<sup>34,35</sup>. The structure  
459 was solved by molecular replacement using the program Phaser<sup>36</sup> implemented in the  
460 PHENIX package<sup>37</sup> and used previously published PPAR $\gamma$  LBD structure (PDB code:  
461 1PRG)<sup>38</sup> as the search model. The structure was refined using PHENIX with several  
462 cycles of interactive model rebuilding in COOT<sup>39</sup>.

### 463 *Molecular dynamics simulations*

464 A crystal structure of GW9662-bound PPAR $\gamma$  (PDB code 3B0R) along with our  
465 crystal structure T0070907 bound to PPAR $\gamma$  (PDB code 6C1I) were used to build initial  
466 structures in all simulations in this study. Two models were generated using 3B0R  
467 crystal structure. In the first model, chain A of 3B0R was used and GW9662 was  
468 transformed to T0070907 by converting phenyl ring of GW9662 to the pyridine ring of  
469 T0070907. The second 3B0R generated model was built using chain B conformation. In  
470 addition, chain B of the T0070907 crystal structure was used for a third build. The  
471 crystalized water molecules were kept in the models in which chain B conformations  
472 were used. The Modeller<sup>40</sup> extension within UCSF Chimera<sup>41</sup> was used to fill in the  
473 missing part of the protein in PDB files. The resulting structures were submitted to H++  
474 server<sup>42</sup> to determine the protonation states of titratable residues at pH 7.4. AMBER  
475 names were assigned to different protonation states of histidine using pdb4amber  
476 provided in AmberTools 14<sup>3</sup>). In order to parametrize T0070907 and GW9662, the C285  
477 with covalently attached ligand was protonated and methyl caps were added, saved as a  
478 separate PDB file using Chimera, and submitted to the R.E.D server<sup>43</sup> to calculate RESP  
479<sup>44</sup> charges. AMBER cysteine residue values were used for the RESP charges for the  
480 cysteine backbone. The output mol2 file was used to generate the ac and prepin files  
481 following a method in the tutorial (<http://ambermd.org/tutorials/basic/tutorial5/>).  
482 Parmchk2 was used to create two force modification files from the prepin file, one that  
483 used AMBER ff14SB<sup>45</sup> parameter database values and another that used general Amber  
484 force field<sup>46</sup> (GAFF2) values, then Tleap was used to generate topology and coordinate  
485 files. The ff14SB force field was used to describe the protein. The resulting structure  
486 was solvated in a truncated octahedral box of TIP3P water molecules with the 10 Å  
487 spacing between the protein and the boundary, neutralized with Na<sup>+</sup> and K<sup>+</sup> and  
488 Cl<sup>-</sup> ions were added to 50 mM. The system was minimized and equilibrated in nine steps  
489 at 310 K with nonbonded cutoff of 8 Å. In the first step the heavy protein atoms were  
490 restrained by a spring constant of 5 kcal/mol Å<sup>2</sup> for 2000 steps, followed by 15 ps



491 simulation under NVT conditions with shake, then two rounds of 2000 cycles of steepest  
492 descent minimization with 2 and 0.1 kcal/mol Å<sup>2</sup> restraints were performed. After one  
493 round without restraints, three rounds of simulations with shake were conducted for 5  
494 ps, 10 ps and 10 ps under NPT conditions and restraints of 1, 0.5 and 0.5 kcal/mol Å<sup>2</sup> on  
495 heavy atoms. Finally, an unrestrained NPT simulation was performed for 200 ps.  
496 Production runs were carried out with hydrogen mass repartitioned<sup>47</sup> parameter files to  
497 enable 4 fs time steps. Constant pressure replicate production runs were carried out with  
498 independent randomized starting velocities. Pressure was controlled with a Monte Carlo  
499 barostat and a pressure relaxation time (taup) of 2 ps. Temperature was kept constant at  
500 310 K with Langevin dynamics utilizing a collision frequency (gamma\_ln) of 3 ps<sup>-1</sup>. The  
501 particle mesh ewald method was used to calculate non-bonded atom interactions with a  
502 cutoff (cut) of 8.0 Å. SHAKE<sup>48</sup> was used to allow longer time steps in addition to  
503 hydrogen mass repartitioning. Analysis of trajectories was performed using cpptraj<sup>49</sup>.  
504 Hydrogen bond analysis was performed using dist = 3.5 Å and angle = 100°<sup>50</sup>.

### 505 *CD Spectroscopy*

506 Protein samples pre-incubated with or without a 2X molar excess of covalent  
507 ligand overnight at 4 °C were diluted to 10 μM in CD buffer (20 mM KPO<sub>4</sub> pH 7.4, 10  
508 mM KCl, 1 mM TCEP, 10% glycerol) and measured on a JASCO J-815 CD spectrometer  
509 by scanning from 190 nm to 300 nm at 20 °C or by increasing the temperature from 20 to  
510 80 °C at 1 °C/min while monitoring the CD signal at 223 nm. Protein unfolding/melting  
511 temperature (T<sub>m</sub>) was determined by fitting the data to a thermal unfolding equation<sup>51</sup>  
512 in GraphPad Prism.

### 513 *NMR spectroscopy*

514 2D [<sup>1</sup>H,<sup>15</sup>N]-TROSY HSQC NMR data of 200 μM <sup>15</sup>N-labeled PPARγ LBD, pre-  
515 incubated with a 2X molar excess of covalent ligand overnight at 4 °C, were acquired at  
516 298K (unless otherwise indicated) on a Bruker 700 MHz NMR instrument equipped with  
517 a QCI cryoprobe in NMR buffer (50 mM potassium phosphate, 20 mM potassium  
518 chloride, 1 mM TCEP, pH 7.4, 10% D<sub>2</sub>O). For peptide titrations, peptides were dissolved  
519 in NMR buffer. ZZ-exchange experiments were acquired at 298K or 310K on Bruker 700  
520 or 800 MHz NMR instrument equipped with a QCI or TCI cryoprobe, respectively,  
521 using exchange mixing times ranging from 0–2 s. Data were processed and analyzed  
522 using Topspin 3.0 (Bruker Biospin) and NMRViewJ (OneMoon Scientific, Inc.)<sup>52</sup>,  
523 respectively. NMR chemical shift assignments previously described for ligand-bound  
524 PPARγ<sup>6,13,26</sup> were assigned to the spectra for well resolved residues with consistent  
525 NMR peak positions the presence of different ligands using the minimum chemical shift  
526 perturbation procedure williamson<sup>53</sup>. ZZ exchange data were fit to an exchange model  
527 for slow two-state interconversion<sup>27,54</sup> using a protocol described by, and a MATLAB  
528 script provided by, Gustafson, et al.<sup>55</sup>.

529 For  $^{19}\text{F}$  NMR, PPAR $\gamma$  LBD K474C mutant protein was used to allow covalent  
530 attachment of 3-bromo-1,1,1-trifluoroacetone (BTFA) helix 12 via K474C. Mass  
531 spectrometry verified that GW9662 and T0070907 (2X molar excess) do not covalently  
532 attach to K474C (using a K474C/C285S double mutant protein that is in capable of  
533 covalent attachment to C285); using wild-type protein confirmed covalently attachment  
534 to C285. Samples were first incubated with 2X GW9662 or T0070907, then incubated  
535 with 2X BTFA, followed by buffer exchange into  $^{19}\text{F}$  NMR buffer (25 mM MOPS, 25 mM  
536 KCl, 1 mM EDTA, pH 7.4, 10% D $_2$ O). 1D  $^{19}\text{F}$  NMR data of 150  $\mu\text{M}$  BTFA-labeled PPAR $\gamma$   
537 LBD bound to GW9662 or T0070907 were acquired at 298K on a Bruker 700 MHz NMR  
538 instrument equipped with QCI-F cryoprobe. Chemical shifts were calibrated using an  
539 internal separated KF reference in  $^{19}\text{F}$  NMR buffer without TCEP contained in a coaxial  
540 tube inserted into the NMR sample tube. KF was set to be  $-119.522$  ppm, which is the  
541 chemical shift of the KF signal with respect to the  $^{19}\text{F}$  basic transmitter frequency for  
542 instrument. 1D  $^{19}\text{F}$  spectra were acquired utilizing the zgfhigqn.2 pulse program  
543 provided in Topspin 3.5 (Bruker Biospin). Data were processed using Topspin and  
544 deconvoluted with decon1d <sup>56</sup>.

## 545 **Acknowledgements**

546 We thank Sarah Mosure and Paola Munoz-Tello for critical reading of the  
547 manuscript. This work was supported by National Institutes of Health (NIH) grants  
548 R01DK101871 (DJK), F32DK108442 (RB), and R00DK103116 (TH); American Heart  
549 Association (AHA) fellowship award 16POST27780018 (RB); and the William R. Kenan,  
550 Jr. Charitable Trust (TSRI High School Student Summer Internship Program). A portion  
551 of this work (ZZ exchange) was performed at the National High Magnetic Field  
552 Laboratory (NHMFL/MagLab), which is supported by National Science Foundation  
553 (NSF) Cooperative Agreement No. DMR-1157490 and the State of Florida.  $^{19}\text{F}$  NMR data  
554 presented herein were collected at the CUNY ASRC Biomolecular NMR Facility.

## 555 **Author contributions**

556 R.B. performed the cellular and biochemical assays. J.S. and J.F. performed  
557 crystallography. J.S. and D.J.K. performed the 2D NMR experiments. I.M.C. and T.S.H.  
558 performed the  $^{19}\text{F}$  NMR experiments. Z.H., T.S.H., and D.J.K. performed the molecular  
559 dynamics simulations. R.B., J.S., J.F., J.B., A.C., and I.M.C. performed mutagenesis  
560 and/or purified proteins. A.-L.B., P.R.G., and T.M.K. supplied compounds. R.B. and D.K.  
561 conceived the experiments and wrote the manuscript with input from all authors.

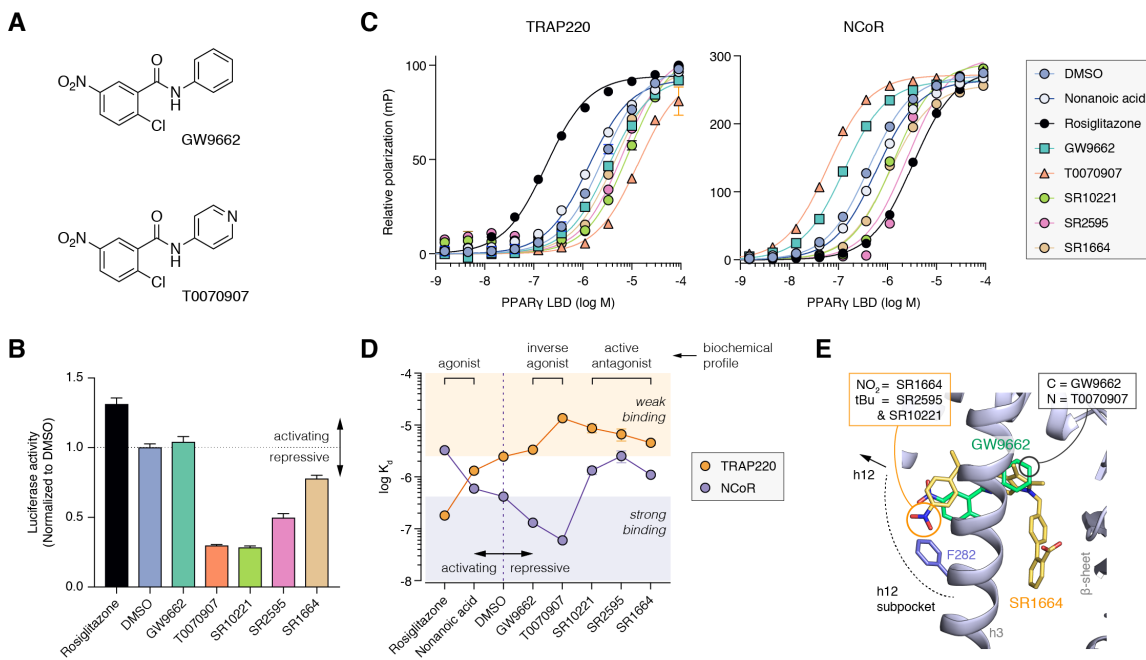

**Figure 1. Differences in functional efficacy between GW9662, T0070907, and other synthetic PPAR $\gamma$  ligands.**

(A) Chemical structures of GW9662 and T0070907.

(B) Cell-based luciferase transcriptional assay showing the effect of activating and repressive ligands (5  $\mu$ M) on full-length PPAR $\gamma$  transcription in HEK293T cells.

(C) Fluorescence polarization coregulator interaction assay showing the effect of ligands on the interaction between the PPAR $\gamma$  LBD and peptides derived from the TRAP220 coactivator or NCoR corepressor.

(D)  $K_d$  values derived from the coregulator interaction assay. Dotted orange and purple lines note the DMSO/apo-PPAR $\gamma$  values. Orange and purple shaded areas note the affinity regions for an ideal inverse agonist (i.e., for weaker TRAP220 affinity, orange circles in the orange square; for higher NCoR affinity, purple circles in purple squares).

(E) Superposition of crystal structures of the PPAR $\gamma$  LBD bound to GW9662 (PDB code 3B0R; ligand in green, cartoon in blue) and SR1664 (PDB code 4R2U; ligand in yellow). The location of the simple substitution between GW9662 (methine) vs. T0070907 (nitrogen) is marked with a black circle, and the SR2595 and SR10221 tert-butyl extension within the helix 12 subpocket towards F282 (blue) from the SR1664 parent compound is marked with a yellow circle.

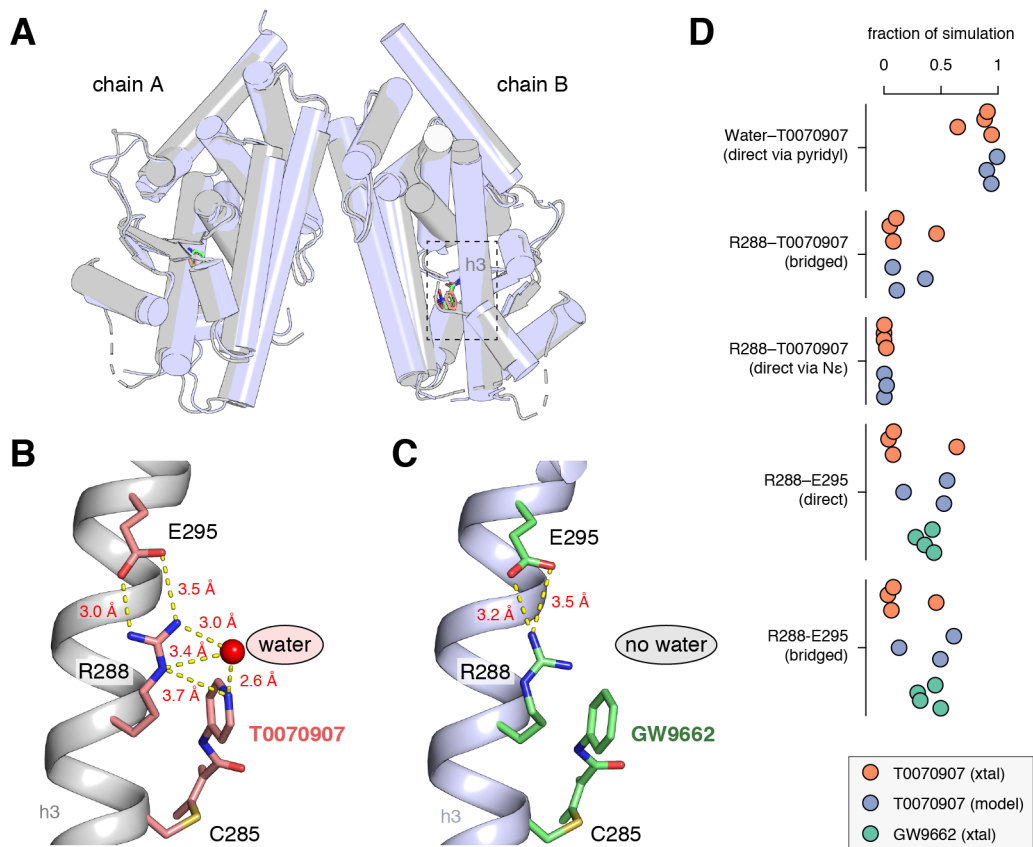

**Figure 2. Crystal structure of T0070907-bound PPAR $\gamma$  LBD reveals a water-mediated pyridyl-protein hydrogen bond network.**

(A) Overall structure of T0070907-bound PPAR $\gamma$  (PDB code 6C1I; grey) and overlay with GW9662-bound crystal structure (PDB code 3B0R; blue).

(B) A water-mediated hydrogen bond network in the T0070907-bound crystal structure (chain B is shown) links the pyridyl group in T0070907 to the R288 side chain, which forms a bipartite hydrogen bond with the E295 side chain.

(C) The GW9662-bound crystal structure (chain B is shown) lacks the R288-ligand hydrogen bond network but contains the R288-E295 hydrogen bond.

(D) Pyridyl-water network hydrogen bonds populated during molecular dynamics simulations for T0070907- and GW9662-bound structures starting from crystallized (xtal) and modeled (model) conformations.

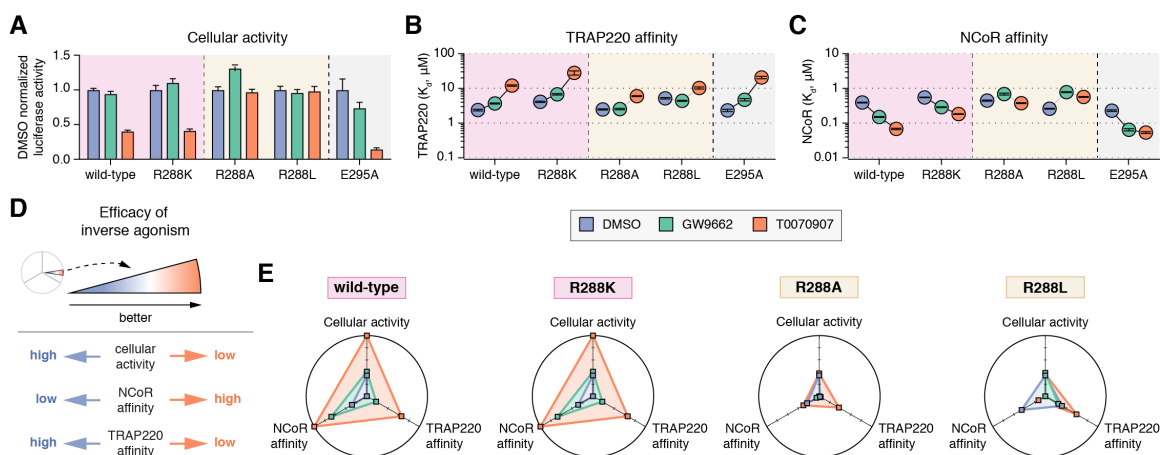

**Figure 3. The R288-pyridyl interaction is essential for conferring inverse agonism.**

(A) HEK293T cells transfected with full-length PPAR $\gamma$  expression plasmid along with a 3x-PPRE-luciferase reporter plasmid and treated with the indicated ligands (5  $\mu$ M). Data plotted as the average and s.e.m. of six experimental replicates.

(B,C) Affinities determined from a fluorescence polarization assay of wild-type and mutant PPAR $\gamma$  LBDs preincubated with a covalent ligand (GW9662 or T0070907) or vehicle (DMSO) binding to FITC-labeled (B) TRAP220 or (C) NCoR. Data plotted as the  $K_a$  value and error from fitting data of two experimental replicates using a one site binding equation.

(D) Legend to the “web of efficacy” radar chart diagrams. Inverse agonism is associated with data points populating the periphery of the plots.

(E) Radar “web of efficacy” plots displaying assay data for wild-type PPAR $\gamma$  and mutant variants. Data normalized within the range of values for each assay (A–C).



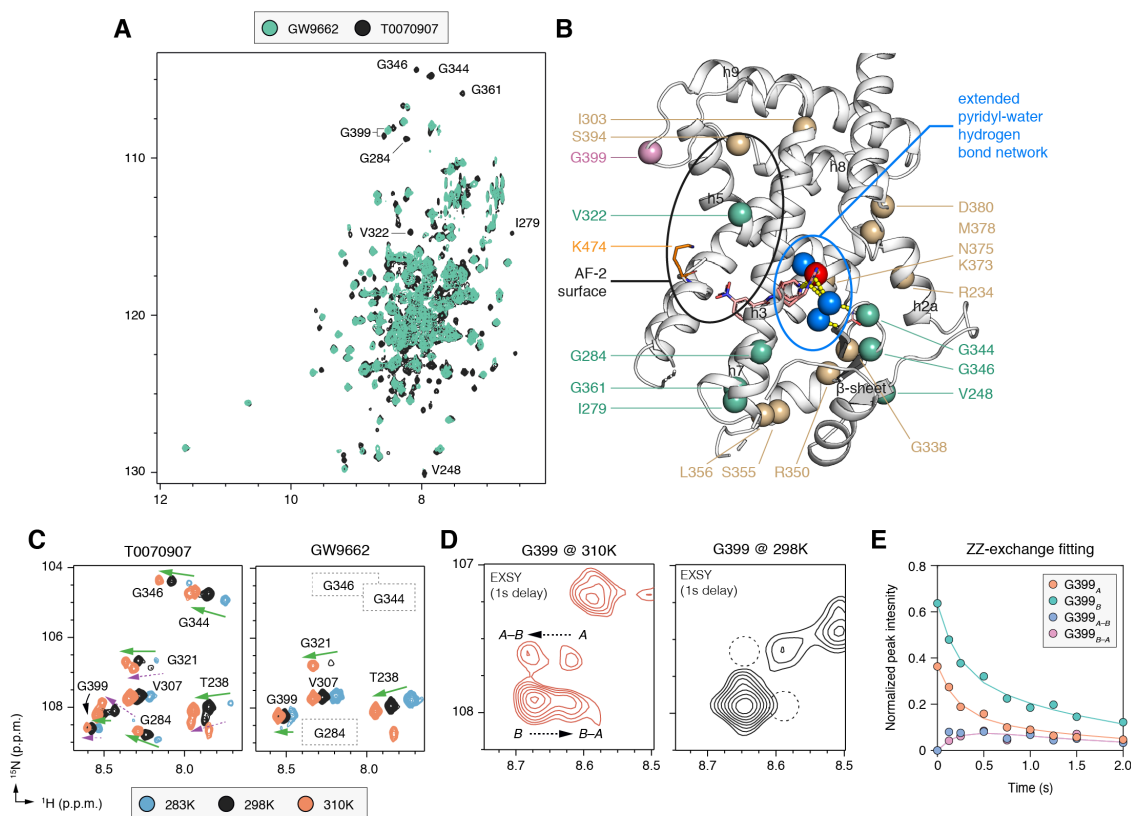

**Figure 4. NMR detected exchange between two long-lived T0070907-bound conformations.**

(A) Overlay of  $[^1\text{H}, ^{15}\text{N}]$ -TROSY-HSQC NMR spectra of  $^{15}\text{N}$ -PPAR $\gamma$  LBD bound to GW9662 or T0070907.

(B) Binding of T0070907 but not GW9662 stabilizes intermediate exchange ( $\mu\text{s}$ - $\text{ms}$  time scale) dynamics (residues labeled in (A) shown in green spheres) and causes peak doubling (tan and pink spheres; G399 is colored pink for emphasis). Data plotted on the T0070907-bound PPAR $\gamma$  crystal structure and important structural regions are highlighted as follows: AF-2 surface (black oval); an extended pyridyl-water hydrogen bond network (blue spheres, yellow dotted lines, blue oval), beyond the key pyridyl-water interaction (red sphere).

(C) Snapshot overlays of  $[^1\text{H}, ^{15}\text{N}]$ -TROSY-HSQC spectra of  $^{15}\text{N}$ -PPAR $\gamma$  LBD bound to T0070907 or GW9662. The spectral region displayed shows single peaks are observed when bound to either ligand (denoted with green arrows), temperature-dependent NMR peak doubling when bound to T0070907 (purple dotted arrows), and absent peaks due to intermediate exchange on the NMR time scale when bound to GW9662 (dotted rectangles)

(D) Snapshots of ZZ-exchange  $^{15}\text{N}$ -HSQC NMR spectra (delay = 1 s) of T0070907-bound  $^{15}\text{N}$ -PPAR $\gamma$  LBD focused on G399 at the indicated temperatures. Two G399 conformational states are denoted as A and B with the ZZ-exchange transfer crosspeaks as A-B and B-A.

(E) ZZ-exchange NMR analysis build-up curve from for G399 at 310K generated by plotting peak intensities of the state A and B peaks and exchange crosspeaks (A-B and B-A) as a function of delay time.

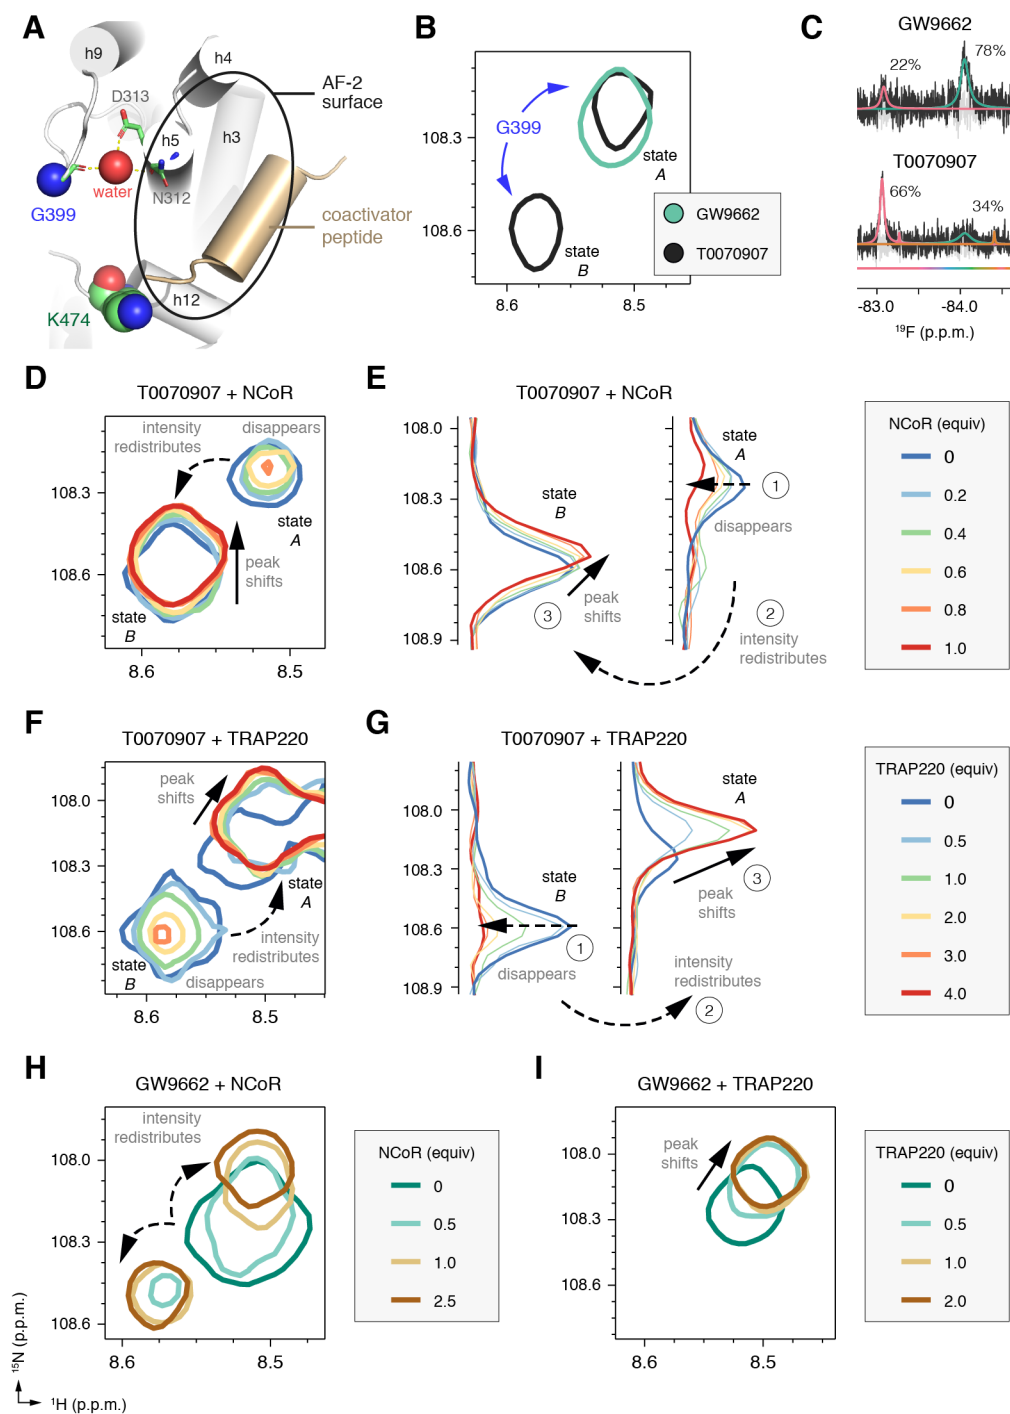

**Figure 5. T0070907 but not GW9662 prepopulates a corepressor-bound conformation.**

(A) Structural location of G399, which is connected to the AF-2 coregulator interaction surface via water-mediated hydrogen bonds to N312 and D313 but does not directly interact with a coregulator peptide bound to the PPAR $\gamma$  LBD (PDB code 2PRG).

(B) Snapshot overlay of  $^1\text{H}$ ,  $^{15}\text{N}$ -TROSY-HSQC NMR spectra of  $^{15}\text{N}$ -PPAR $\gamma$  LBD bound

to GW9662 or T0070907 shows that the single GW9662-bound G399 peak has similar chemical shift values to one of the two T0070907-bound G399 peaks (state *A*) whereas state *B* is uniquely populated by T0070907.

(C) Deconvoluted  $^{19}\text{F}$  NMR data of BTFA-labeled PPAR $\gamma$  LBD covalently bound to GW9662 or T0070907.

(D–I) Snapshots of  $^1\text{H},^{15}\text{N}$ -TROSY-HSQC spectra of  $^{15}\text{N}$ -PPAR $\gamma$  LBD bound to (D,E) T0070907 and titrated with NCoR peptide; (F,G) T0070907 and titrated with TRAP220 peptide; (H) GW9662 and titrated with NCoR peptide; and (I) GW9662 and titrated with TRAP220 peptide. 1D spectra in (E) and (G) show  $^{15}\text{N}$  planes extracted from (D) and (F), respectively, to better illustrate the peak transitions: **1**, disappearance of the state *A* or *B* peak; **2**, the redistribution of their intensities to the other state; and **3**, the slight shifting of the other state towards, increased population of, the peptide-bound state.

## References

1. Soccio, R.E., Chen, E.R. & Lazar, M.A. Thiazolidinediones and the promise of insulin sensitization in type 2 diabetes. *Cell Metab* **20**, 573-91 (2014).
2. Choi, J.H. et al. Anti-diabetic drugs inhibit obesity-linked phosphorylation of PPARgamma by Cdk5. *Nature* **466**, 451-6 (2010).
3. Choi, J.H. et al. Antidiabetic actions of a non-agonist PPARgamma ligand blocking Cdk5-mediated phosphorylation. *Nature* **477**, 477-81 (2011).
4. Choi, S.S. et al. A novel non-agonist peroxisome proliferator-activated receptor gamma (PPARgamma) ligand UHC1 blocks PPARgamma phosphorylation by cyclin-dependent kinase 5 (CDK5) and improves insulin sensitivity. *J Biol Chem* **289**, 26618-29 (2014).
5. Stechschulte, L.A. et al. PPARG Post-translational Modifications Regulate Bone Formation and Bone Resorption. *EBioMedicine* **10**, 174-84 (2016).
6. Marciano, D.P. et al. Pharmacological repression of PPARgamma promotes osteogenesis. *Nat Commun* **6**, 7443 (2015).
7. Picard, F. et al. Sirt1 promotes fat mobilization in white adipocytes by repressing PPAR-gamma. *Nature* **429**, 771-6 (2004).
8. Nakano, R. et al. Antagonism of peroxisome proliferator-activated receptor gamma prevents high-fat diet-induced obesity in vivo. *Biochem Pharmacol* **72**, 42-52 (2006).
9. Zaytseva, Y.Y., Wallis, N.K., Southard, R.C. & Kilgore, M.W. The PPARgamma antagonist T0070907 suppresses breast cancer cell proliferation and motility via both PPARgamma-dependent and -independent mechanisms. *Anticancer Res* **31**, 813-23 (2011).
10. Burton, J.D., Goldenberg, D.M. & Blumenthal, R.D. Potential of peroxisome proliferator-activated receptor gamma antagonist compounds as therapeutic agents for a wide range of cancer types. *PPAR Res* **2008**, 494161 (2008).
11. Nakajima, A. et al. Inhibition of peroxisome proliferator-activated receptor gamma activity suppresses pancreatic cancer cell motility. *Cancer Sci* **99**, 1892-900 (2008).
12. Johnson, B.A. et al. Ligand-induced stabilization of PPARgamma monitored by NMR spectroscopy: implications for nuclear receptor activation. *J Mol Biol* **298**, 187-94 (2000).
13. Hughes, T.S. et al. Ligand and receptor dynamics contribute to the mechanism of graded PPAR $\gamma$  agonism. *Structure* **20**, 139-50 (2012).

14. Bruning, J.B. et al. Partial agonists activate PPAR $\gamma$  using a helix 12 independent mechanism. *Structure* **15**, 1258-71 (2007).
15. Berger, J.P. et al. Distinct properties and advantages of a novel peroxisome proliferator-activated protein [ $\gamma$ ] selective modulator. *Mol Endocrinol* **17**, 662-76 (2003).
16. Trump, R.P. et al. Co-crystal structure guided array synthesis of PPAR $\gamma$  inverse agonists. *Bioorg Med Chem Lett* **17**, 3916-20 (2007).
17. Leesnitzer, L.M. et al. Functional consequences of cysteine modification in the ligand binding sites of peroxisome proliferator activated receptors by GW9662. *Biochemistry* **41**, 6640-50 (2002).
18. Lee, G. et al. T0070907, a selective ligand for peroxisome proliferator-activated receptor  $\gamma$ , functions as an antagonist of biochemical and cellular activities. *The Journal of biological chemistry* **277**, 19649-57 (2002).
19. Brust, R. et al. Modification of the Orthosteric PPAR $\gamma$  Covalent Antagonist Scaffold Yields an Improved Dual-Site Allosteric Inhibitor. *ACS Chemical Biology* **12**, 969-978 (2017).
20. Ge, K. et al. Transcription coactivator TRAP220 is required for PPAR  $\gamma$  2-stimulated adipogenesis. *Nature* **417**, 563-7 (2002).
21. Yu, C. et al. The nuclear receptor corepressors NCoR and SMRT decrease peroxisome proliferator-activated receptor  $\gamma$  transcriptional activity and repress 3T3-L1 adipogenesis. *J Biol Chem* **280**, 13600-5 (2005).
22. Liberato, M.V. et al. Medium chain fatty acids are selective peroxisome proliferator activated receptor (PPAR)  $\gamma$  activators and pan-PPAR partial agonists. *PLoS One* **7**, e36297 (2012).
23. Evans, B.A., Sato, M., Sarwar, M., Hutchinson, D.S. & Summers, R.J. Ligand-directed signalling at beta-adrenoceptors. *Br J Pharmacol* **159**, 1022-38 (2010).
24. Kenakin, T. New concepts in pharmacological efficacy at 7TM receptors: IUPHAR review 2. *Br J Pharmacol* **168**, 554-75 (2013).
25. Kojetin, D.J. & Burris, T.P. Small molecule modulation of nuclear receptor conformational dynamics: implications for function and drug discovery. *Molecular pharmacology* **83**, 1-8 (2013).
26. Hughes, T.S. et al. An alternate binding site for PPAR $\gamma$  ligands. *Nat Commun* **5**, 3571 (2014).
27. Kleckner, I.R. & Foster, M.P. An introduction to NMR-based approaches for measuring protein dynamics. *Biochim. Biophys. Acta* **1814**, 942-68 (2011).



28. Pennington, L.D. & Moustakas, D.T. The Necessary Nitrogen Atom: A Versatile High-Impact Design Element for Multiparameter Optimization. *J Med Chem* **60**, 3552-3579 (2017).
29. Fujioka, M. & Omori, N. Subtleties in GPCR drug discovery: a medicinal chemistry perspective. *Drug Discov Today* **17**, 1133-8 (2012).
30. Dosa, P.I. & Amin, E.A. Tactical Approaches to Interconverting GPCR Agonists and Antagonists. *J Med Chem* **59**, 810-40 (2016).
31. Watson, P.J., Fairall, L. & Schwabe, J.W. Nuclear hormone receptor co-repressors: structure and function. *Mol Cell Endocrinol* **348**, 440-9 (2012).
32. Einstein, M. et al. The differential interactions of peroxisome proliferator-activated receptor gamma ligands with Tyr473 is a physical basis for their unique biological activities. *Mol Pharmacol* **73**, 62-74 (2008).
33. Acton, J.J., 3rd et al. Benzoyl 2-methyl indoles as selective PPARgamma modulators. *Bioorg Med Chem Lett* **15**, 357-62 (2005).
34. Batty, T.G., Kontogiannis, L., Johnson, O., Powell, H.R. & Leslie, A.G. iMOSFLM: a new graphical interface for diffraction-image processing with MOSFLM. *Acta Crystallogr D Biol Crystallogr* **67**, 271-81 (2011).
35. Winn, M.D. et al. Overview of the CCP4 suite and current developments. *Acta Crystallogr D Biol Crystallogr* **67**, 235-42 (2011).
36. McCoy, A.J. et al. Phaser crystallographic software. *J Appl Crystallogr* **40**, 658-674 (2007).
37. Adams, P.D. et al. The Phenix software for automated determination of macromolecular structures. *Methods* **55**, 94-106 (2011).
38. Nolte, R.T. et al. Ligand binding and co-activator assembly of the peroxisome proliferator-activated receptor-gamma. *Nature* **395**, 137-43 (1998).
39. Emsley, P. & Cowtan, K. Coot: model-building tools for molecular graphics. *Acta Crystallogr D Biol Crystallogr* **60**, 2126-32 (2004).
40. Eswar, N. et al. Comparative protein structure modeling using Modeller. *Curr Protoc Bioinformatics* **Chapter 5**, Unit-5 6 (2006).
41. Pettersen, E.F. et al. UCSF Chimera--a visualization system for exploratory research and analysis. *J Comput Chem* **25**, 1605-12 (2004).
42. Gordon, J.C. et al. H++: a server for estimating pKas and adding missing hydrogens to macromolecules. *Nucleic Acids Res* **33**, W368-71 (2005).

43. Vanquelef, E. et al. R.E.D. Server: a web service for deriving RESP and ESP charges and building force field libraries for new molecules and molecular fragments. *Nucleic Acids Res* **39**, W511-7 (2011).
44. Cornell, W.D., Cieplak, P., Bayly, C.I. & Kollmann, P.A. Application of RESP charges to calculate conformational energies, hydrogen bond energies, and free energies of solvation. *J. Am. Chem. Soc.* **115**, 9620–9631 (1993).
45. Maier, J.A. et al. ff14SB: Improving the Accuracy of Protein Side Chain and Backbone Parameters from ff99SB. *J Chem Theory Comput* **11**, 3696-713 (2015).
46. Wang, J., Wolf, R.M., Caldwell, J.W., Kollman, P.A. & Case, D.A. Development and testing of a general amber force field. *J Comput Chem* **25**, 1157-74 (2004).
47. Hopkins, C.W., Le Grand, S., Walker, R.C. & Roitberg, A.E. Long-Time-Step Molecular Dynamics through Hydrogen Mass Repartitioning. *J Chem Theory Comput* **11**, 1864-74 (2015).
48. Ryckaert, J.P., Ciccotti, G. & Berendsen, H.J.C. Numerical integration of the cartesian equations of motion of a system with constraints: molecular dynamics of n-alkanes. *J Comput Phys* **23**, 327-41 (1977).
49. Roe, D.R. & Cheatham, T.E.I. PTRAJ and CPPTRAJ: Software for Processing and Analysis of Molecular Dynamics Trajectory Data. *J Chem Theory Comput* **9**, 3084-95 (2013).
50. Fabiola, F., Bertram, R., Korostelev, A. & Chapman, M.S. An improved hydrogen bond potential: impact on medium resolution protein structures. *Protein Sci* **11**, 1415-23 (2002).
51. Greenfield, N.J. Using circular dichroism collected as a function of temperature to determine the thermodynamics of protein unfolding and binding interactions. *Nat Protoc* **1**, 2527-35 (2006).
52. Johnson, B.A. Using NMRView to visualize and analyze the NMR spectra of macromolecules. *Methods Mol Biol* **278**, 313-52 (2004).
53. Williamson, M.P. Using chemical shift perturbation to characterise ligand binding. *Prog Nucl Magn Reson Spectrosc* **73**, 1-16 (2013).
54. Palmer, A.G., 3rd, Kroenke, C.D. & Loria, J.P. Nuclear magnetic resonance methods for quantifying microsecond-to-millisecond motions in biological macromolecules. *Methods Enzymol* **339**, 204-38 (2001).
55. Gustafson, C.L. et al. A Slow Conformational Switch in the BMAL1 Transactivation Domain Modulates Circadian Rhythms. *Mol Cell* **66**, 447-457 e7 (2017).

56. Hughes, T.S., Wilson, H.D., de Vera, I.M. & Kojetin, D.J. Deconvolution of Complex 1D NMR Spectra Using Objective Model Selection. *PLoS One* **10**, e0134474 (2015).

**Table S1. X-ray data collection and refinement statistics.**

|                                                                 |                            |
|-----------------------------------------------------------------|----------------------------|
|                                                                 | T0070907-PPAR $\gamma$ LBD |
| <b>Data collection</b>                                          | ALS-BCSB 5.0.1             |
| Space group                                                     | C 1 2 1                    |
| Cell dimensions                                                 |                            |
| $a, b, c$ (Å)                                                   | 92.99, 61.69, 118.66       |
| $\alpha, \beta, \gamma$ (°)                                     | 90, 102.31, 90             |
| Resolution                                                      | 45.43–2.26 (2.341–2.26)    |
| $R_{\text{pim}}$                                                | 0.02979 (0.3361)           |
| $I / \sigma(I)$                                                 | 10.73 (2.12)               |
| CC1/2 in highest shell                                          | 0.906                      |
| Completeness (%)                                                | 99.53 (99.84)              |
| Redundancy                                                      | 2.0 (2.0)                  |
|                                                                 |                            |
| <b>Refinement</b>                                               |                            |
| Resolution (Å)                                                  | 2.26                       |
| No. of reflections                                              | 61110                      |
| $R_{\text{work}}/R_{\text{free}}$ (%)                           | 21.54/28.38                |
| No. of atoms                                                    |                            |
| Protein                                                         | 4181                       |
| Water                                                           | 308                        |
| $B$ -factors                                                    |                            |
| Protein                                                         | 32.35                      |
| Ligand                                                          | 44.64                      |
| Water                                                           | 30.64                      |
| Root mean square                                                |                            |
| Bond lengths (Å)                                                | 0.008                      |
| Bond angles (°)                                                 | 0.94                       |
| Ramachandran favored                                            | 95.11                      |
| Ramachandran outliers                                           | 0.59                       |
| PDB accession code                                              | 6C1I                       |
|                                                                 |                            |
| <i>Values in parentheses indicate highest resolution shell.</i> |                            |

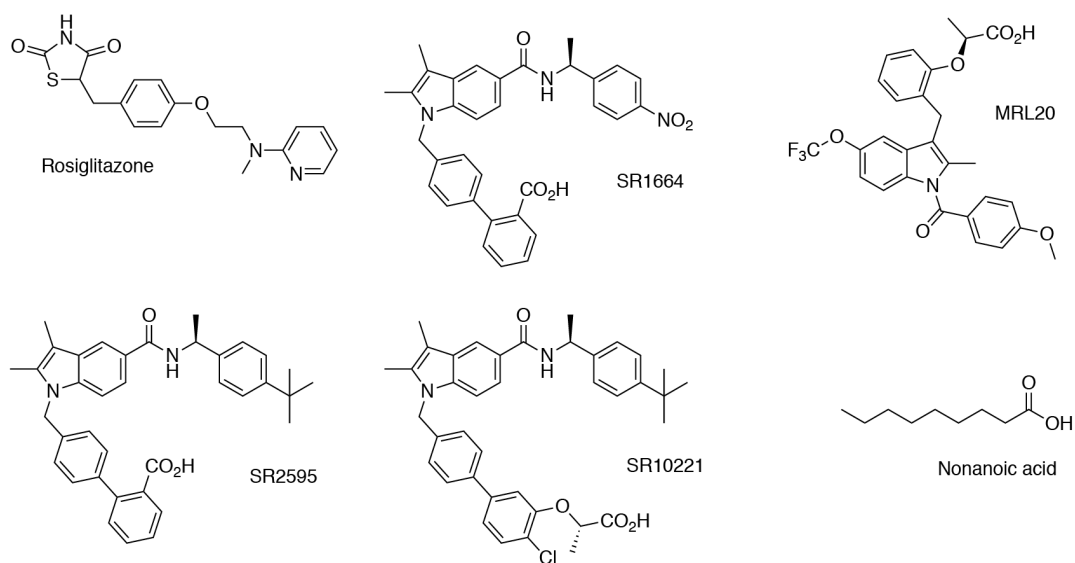

**Figure S1. Noncovalent ligands used in the study.**



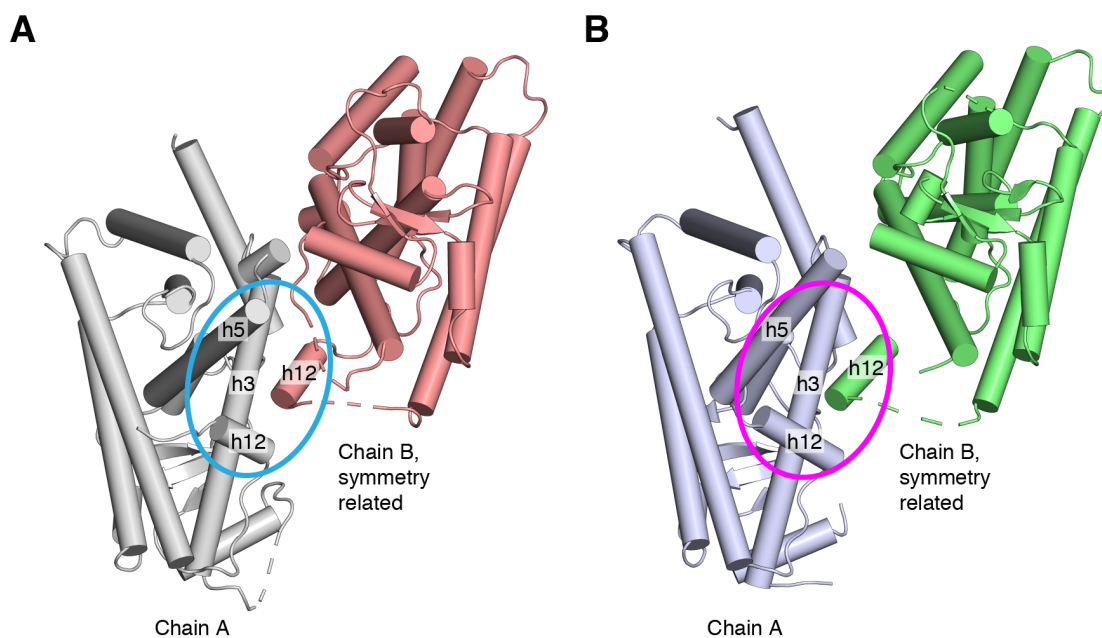

**Figure S2. Distorted helix 12 conformations due to crystal contacts.**

Shown are chain A and the symmetry related chain B for the (A) T0070907-bound and (B) GW9662-bound (PDB 3B0R) PPAR $\gamma$  LBD crystal structures, where the chain B helix 12 docks into the AF-2 surface of chain A formed by helix 3, 5, and 12.

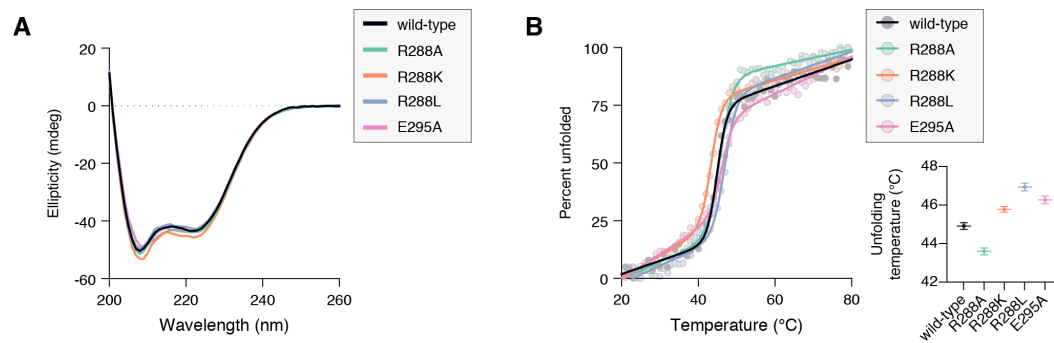

**Figure S3. Circular dichroism (CD) spectroscopy data on PPAR $\gamma$  LBD mutants.**

(A) CD spectra and (B) CD thermal melt experiments (inset, fitted melting/unfolding temperatures).

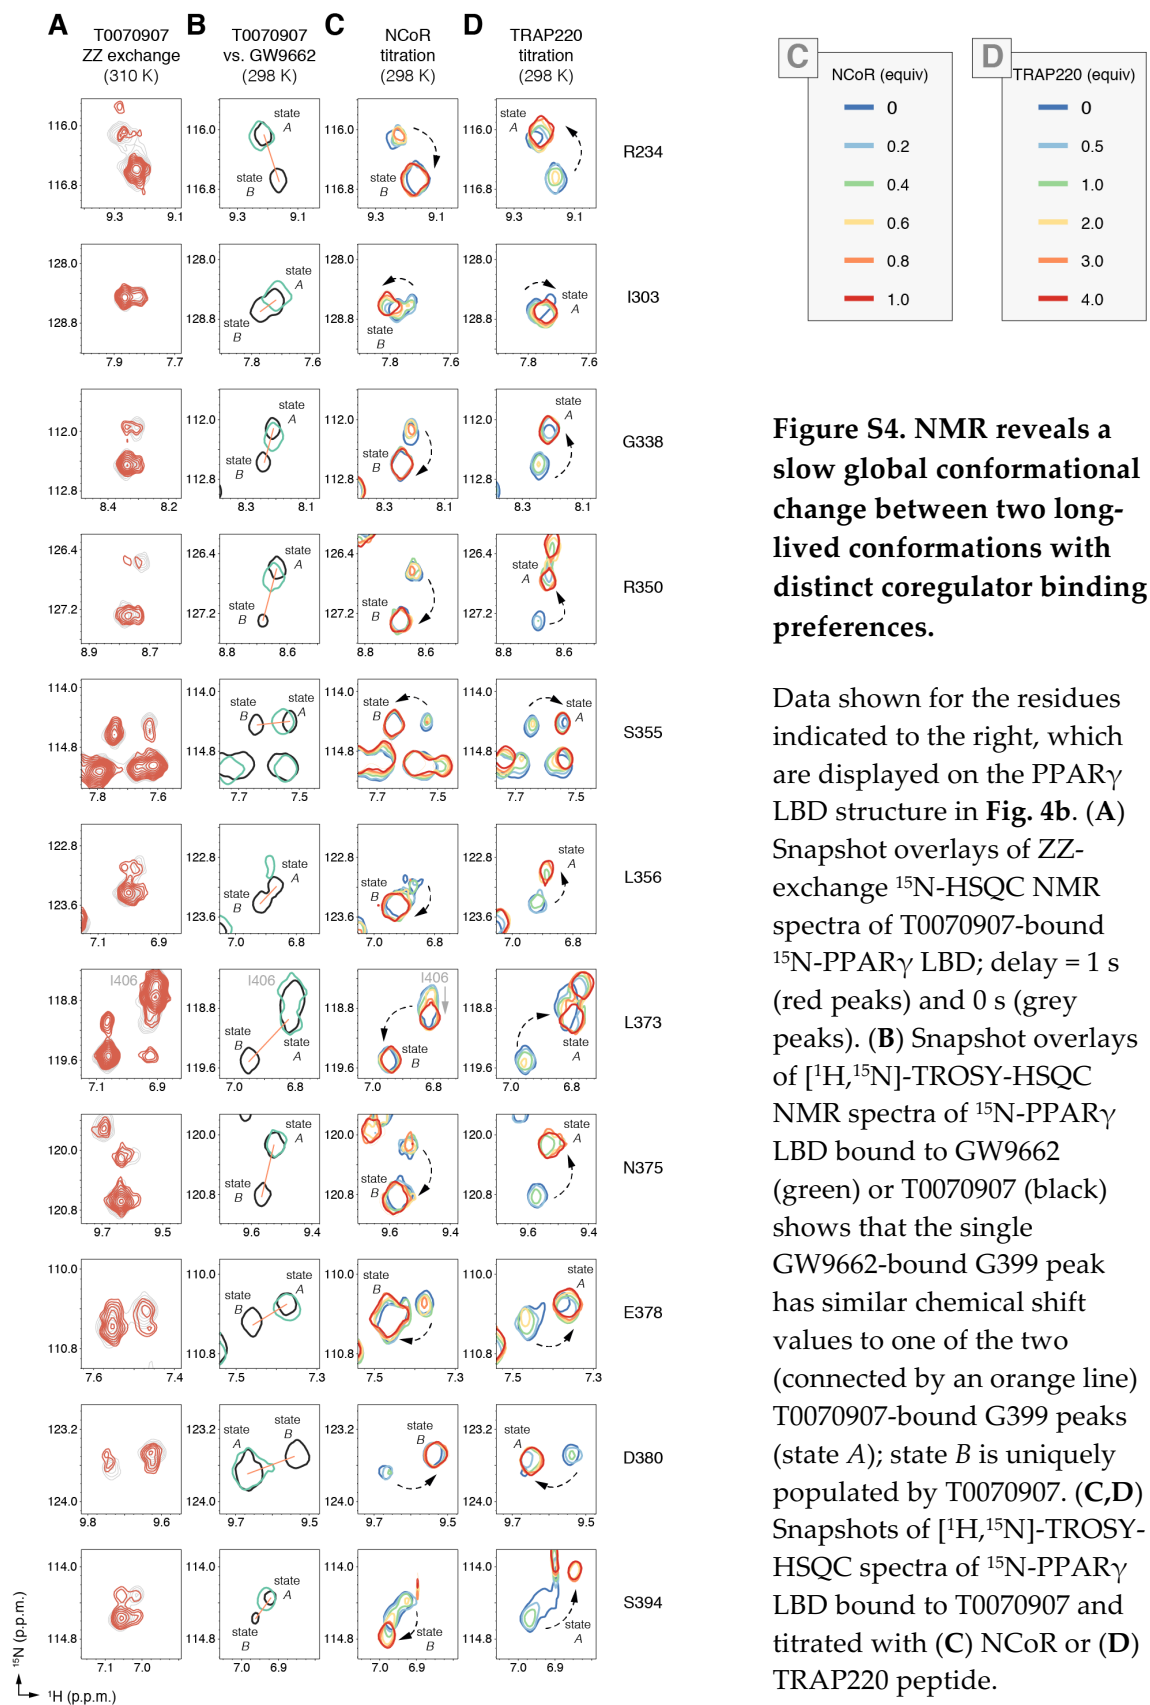

Source: http://biorxiv.org/content/10.1101/245852v1.full.pdf
